# Supplementary material for: Precipitating CsPbBr3 quantum dots in boro-germanate glass with a dense structure and inert environment toward highly stable and efficient narrow-band green emitters for wide-color-gamut liquid crystal displays
Source: Royal Society of Chemistry journal article supplement (doi:10.1039/c9tc04732h), 2019-01-01
Supplement: c9tc04732h1.pdf [file c9tc04732h1.pdf]

## SUPPORTING INFORMATION

### **Precipitating CsPbBr<sub>3</sub> quantum dots in boro-germanate glasses with dense structure and inert environment toward high stable and efficient narrow-band green emitter for wide-color-gamut liquid crystal display**

Xiaoliang Pang,<sup>a</sup> Haoran Zhang,<sup>a,\*</sup> Liqing Xie,<sup>a</sup> Tongtong Xuan,<sup>b</sup> Yuqiong Sun,<sup>a</sup> Shuaichen Si,<sup>c</sup> Bin Jiang,<sup>a</sup> Weibin Chen,<sup>a</sup> Jianle Zhuang,<sup>a</sup> Chaofan Hu,<sup>a</sup> Yingliang Liu,<sup>a</sup> Bingfu Lei,<sup>a,\*</sup> and Xuejie Zhang<sup>a,\*</sup>

<sup>a</sup>*Guangdong Provincial Engineering Technology Research Center for Optical Agriculture, College of Materials and Energy, South China Agricultural University, Guangzhou 510642, China*

<sup>b</sup>*College of Materials, Xiamen University, Xiamen 361005, China*

<sup>c</sup>*School of Chemistry, Sun Yat-sen University, Guangzhou 510275, China*

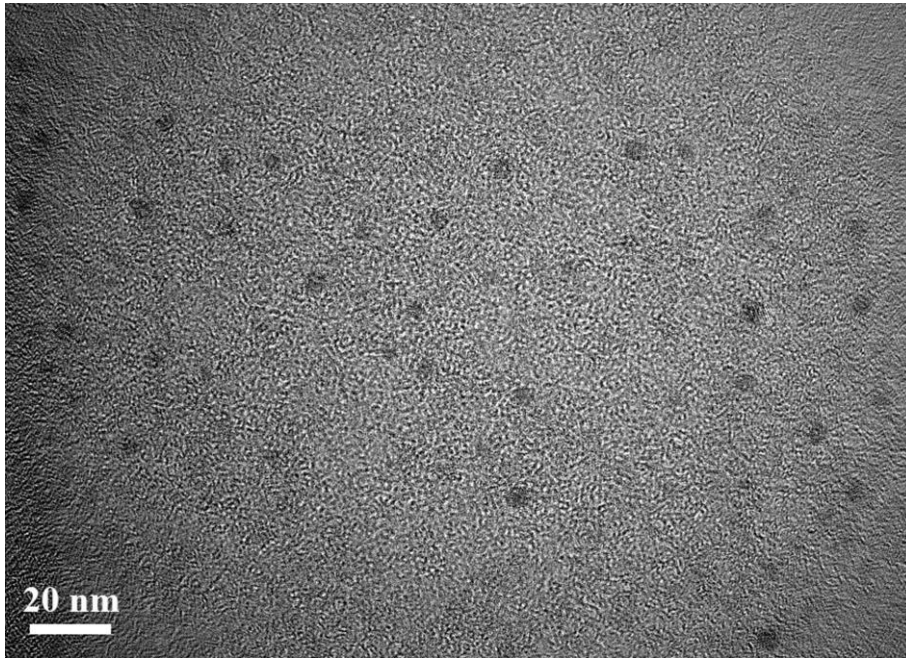

**Figure.S1.** TEM image of CsPbBr<sub>3</sub> QDs@glass (460 °C/10 h) sample.

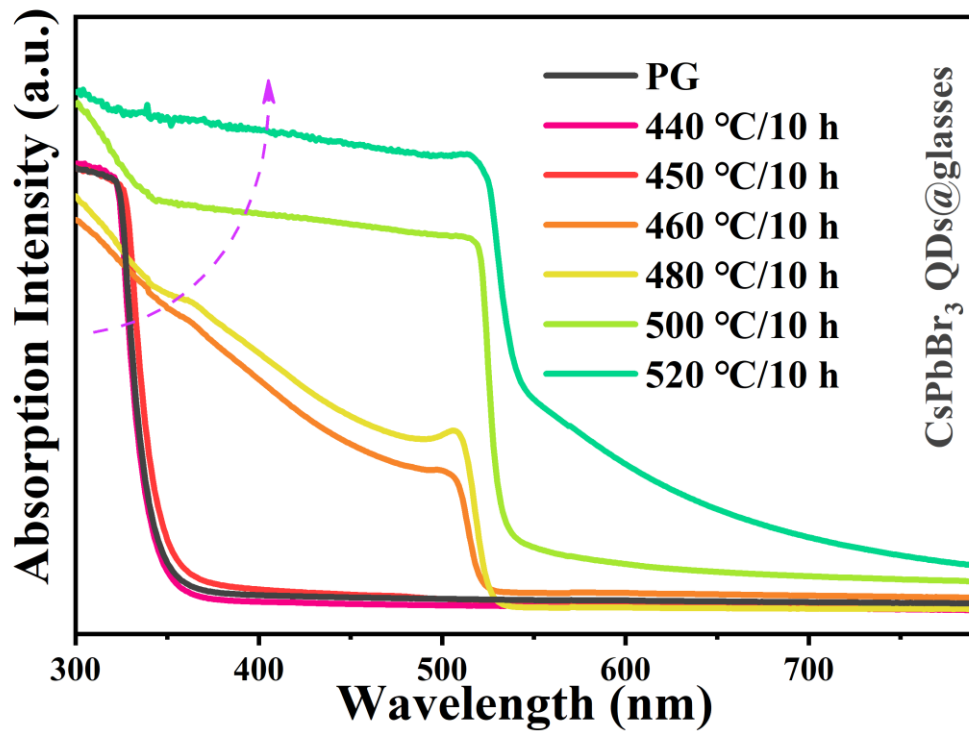

**Fig. S2.** The absorption spectra of a series of CsPbBr<sub>3</sub> QDs@glass samples, those samples are obtained at different heat-treated temperature (440~520 °C) for 10 hours.

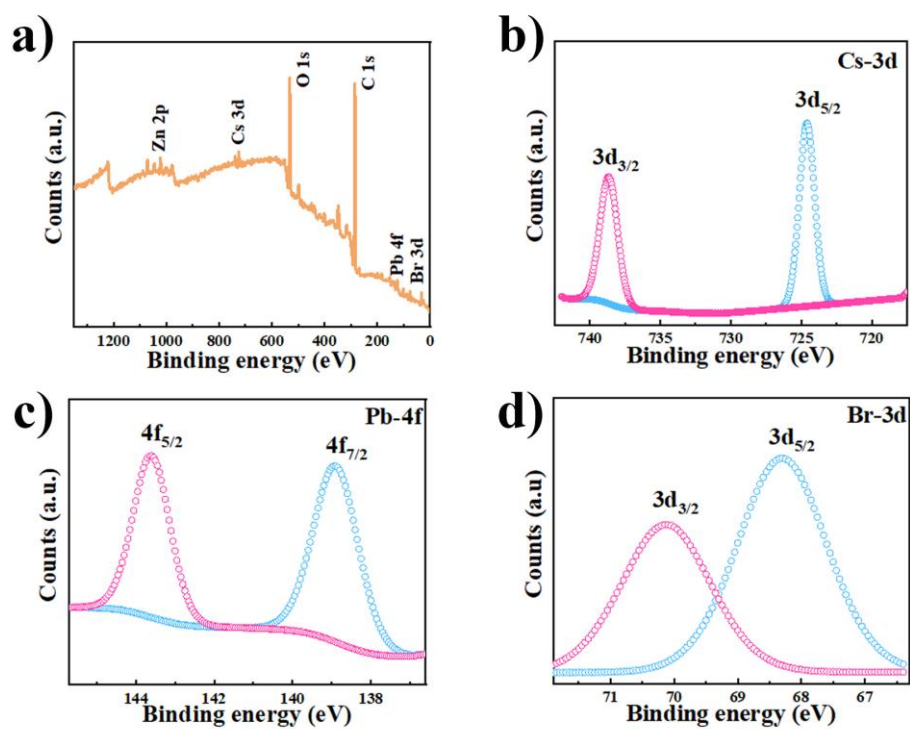

**Fig. S3.** (a) XPS survey of CsPbBr<sub>3</sub> QDs@glass (460 °C/10 h). (b-d) The high-resolution XPS analysis corresponding to Cs 3d, Pb 4f, Br 3d, respectively.

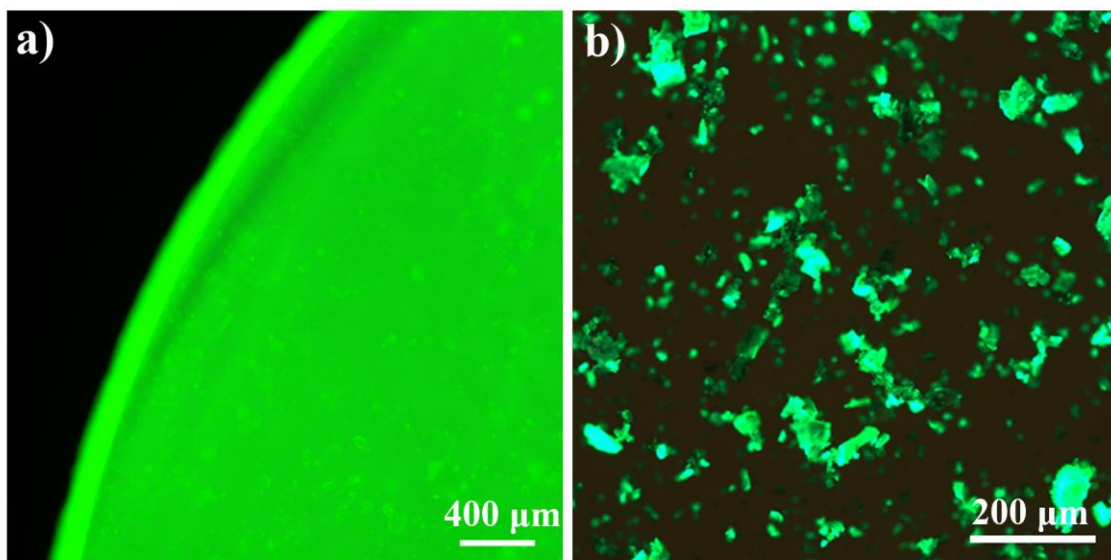

**Fig. S4.** (a) Optical microscope photograph of bulk CsPbBr<sub>3</sub> QDs@glass (460 °C/10 h). (b) Optical microscope photograph after grinding the corresponding bulk CsPbBr<sub>3</sub> QDs@glass into powder.

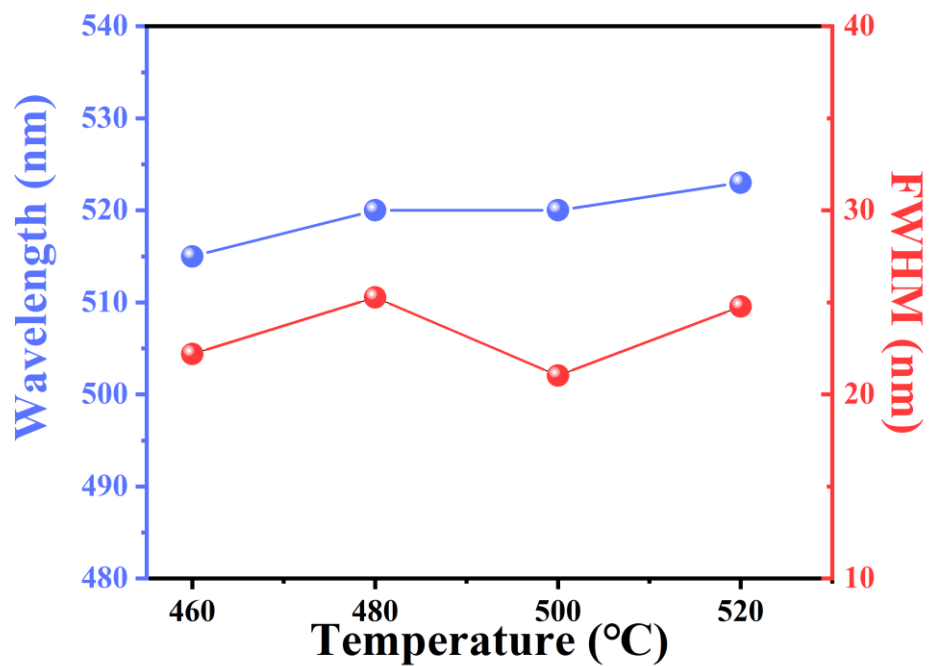

**Fig. S5.** Peak wavelength and FWHM variations of CsPbBr<sub>3</sub> QDs@glass samples dependence of heat-treatment temperature.

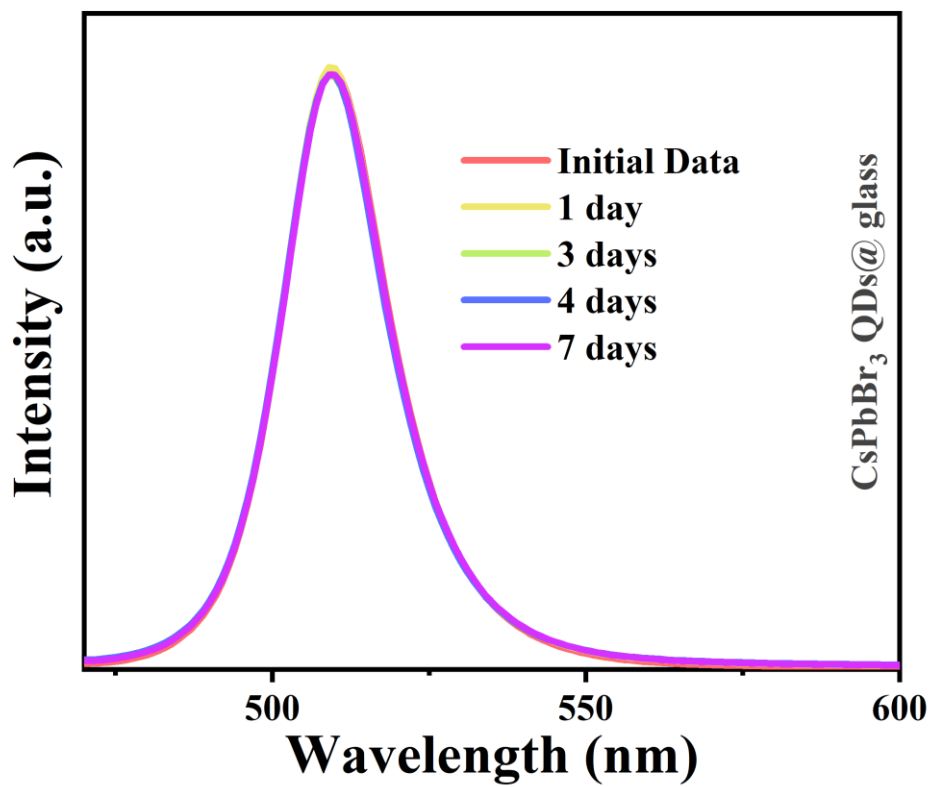

**Fig. S6.** PL spectra of CsPbBr<sub>3</sub> QDs@glass (460 °C/10 h) in thermal aging experiment with 100 °C for different times.

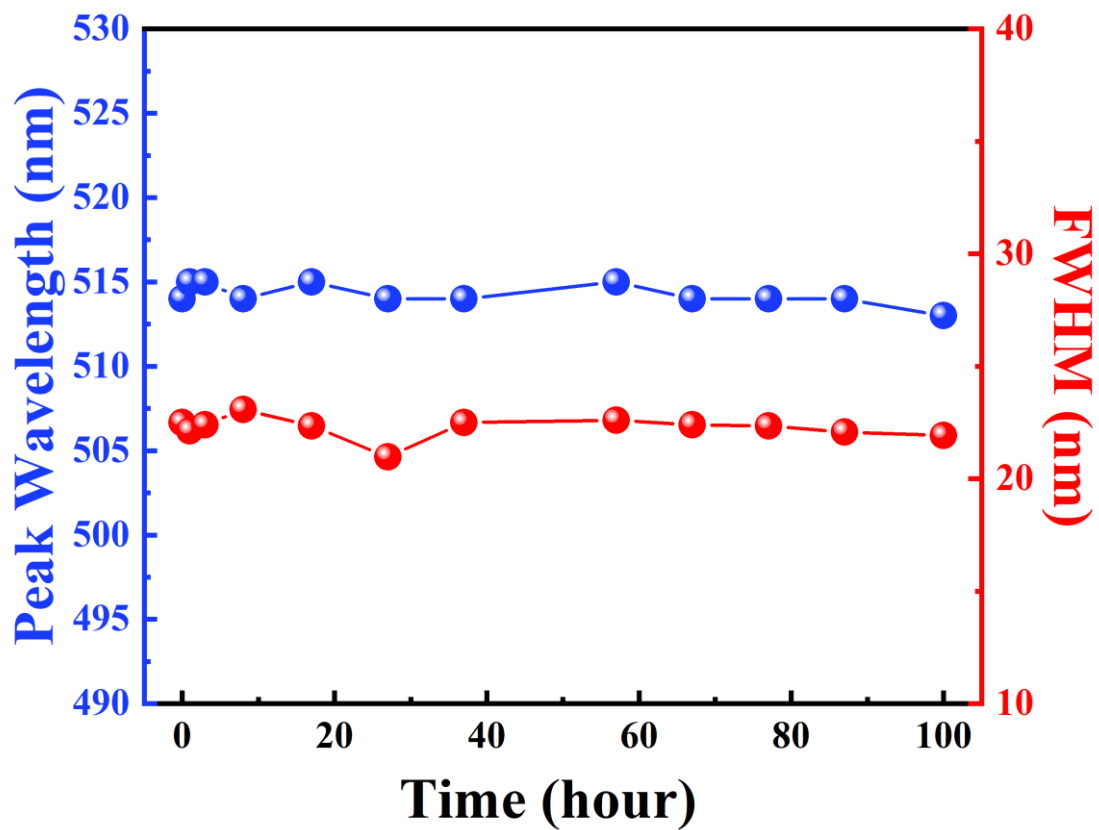

**Fig. S7.** Peak wavelength and FWHM variations of CsPbBr<sub>3</sub> QDs@glass (460 °C/10 h) in the time-dependent UV light irradiation experiment.



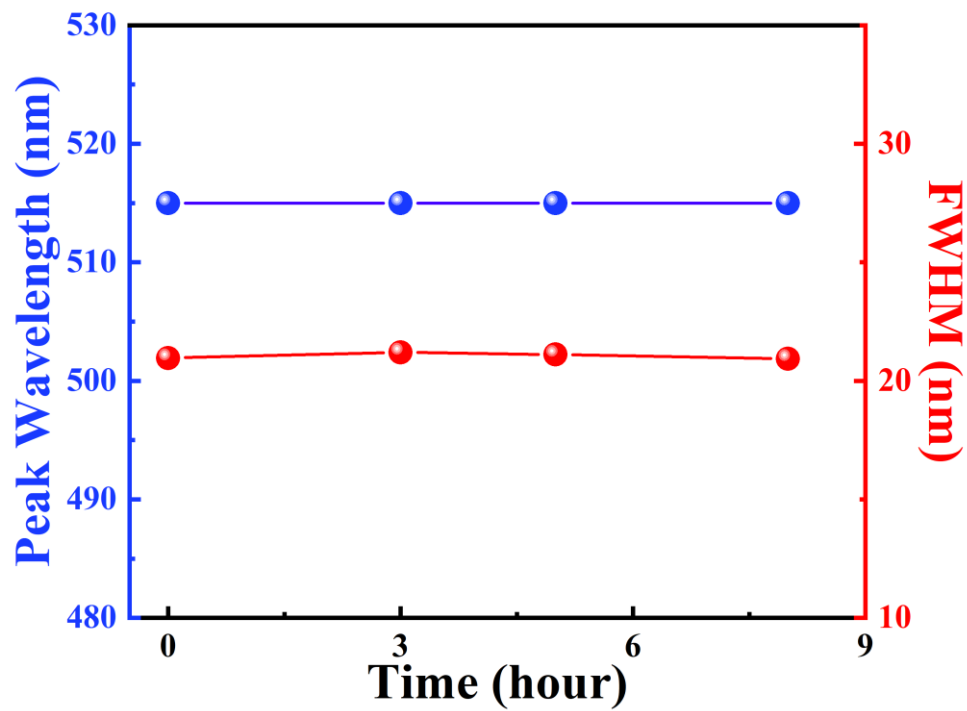

**Fig. S8.** The change of peak wavelength and FWHM in CsPbBr<sub>3</sub> QDs@glass (460 °C/10 h) sample in the time-dependent blue light irradiation experiment.

**Table S1.** CIE color coordinates of the as-fabricated CsPbBr<sub>3</sub> QDs@glass based green-emitting LED device under various forward-bias currents.

| Serial number             | Driven current (mA) | CIE coordinates                       |                                       |
|---------------------------|---------------------|---------------------------------------|---------------------------------------|
|                           |                     | <i>x</i>                              | <i>y</i>                              |
| 1                         | 20                  | 0.1681                                | 0.6788                                |
| 2                         | 30                  | 0.1653                                | 0.6878                                |
| 3                         | 40                  | 0.1662                                | 0.6814                                |
| 4                         | 50                  | 0.1650                                | 0.6816                                |
| 5                         | 60                  | 0.1624                                | 0.6892                                |
| 6                         | 70                  | 0.1620                                | 0.6880                                |
| 7                         | 80                  | 0.1634                                | 0.6782                                |
| 8                         | 90                  | 0.1628                                | 0.6760                                |
| 9                         | 100                 | 0.1646                                | 0.6653                                |
| <b>Chromaticity shift</b> |                     | <b><math>\Delta x = 0.0035</math></b> | <b><math>\Delta y = 0.0035</math></b> |

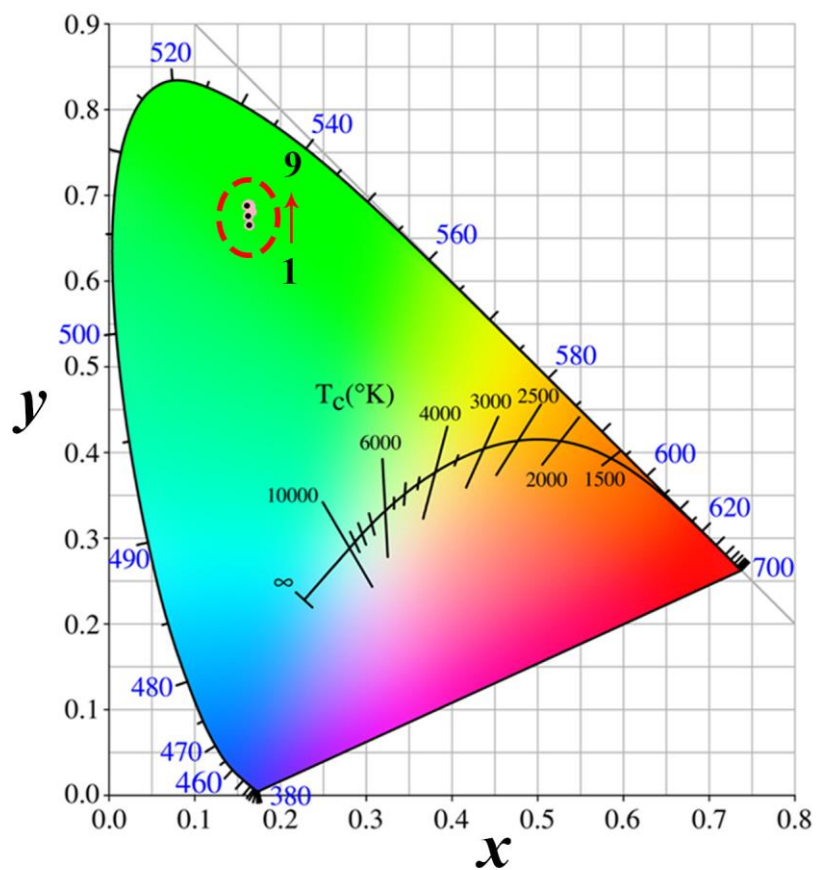

**Fig. S9.** CIE chromaticity coordinates of the as-fabricated CsPbBr<sub>3</sub> QDs@glass based green-emitting LED device under various forward-bias currents, number 1-9 represents different driven currents in Table S1.
